# Supplementary material
Source: publisher site journal article supplement (https://www.spandidos-publications.com/3496/downloadSupplementary)
Supplement: Supplementary file 1 [file downloadSupplementary]

Figure S1. Effect of different concentrations of propofol on cell viability of H9C2 cells subjected to hypoxia/reoxygenation injury. Cell viability was measured by CCK-8 assay. Data are presented as mean  $\pm$  SD (n=3). \*P<0.05, \*\*P<0.001 compared with control untreated cells. OD, optical density.

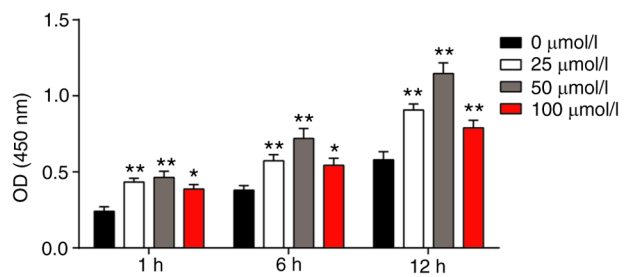

Figure S2. Transfection efficiency of miR-449a inhibitor and NR4A2 siRNA in untreated cells. (A) miR-449a expression levels were evaluated by reverse transcription-quantitative PCR in untreated parental H9C2 cells (control), and in cells transfected with NC or inhibitor. (B) NR4A2 mRNA and (C) protein expression levels were evaluated in untreated parental H9C2 cells (control), and in cells transfected with NR4A2-targeting siRNA or si-NC. Data are presented as mean  $\pm$  SD (n=3). \*\*P<0.001 compared with control untreated cells. miR, miRNA; NR4A2, nuclear receptor subfamily 4 group A member 2; siRNA, small interfering RNA; NC, negative control; Con, control; si-NC, negative control siRNA; si, NR4A2-targeting siRNA.

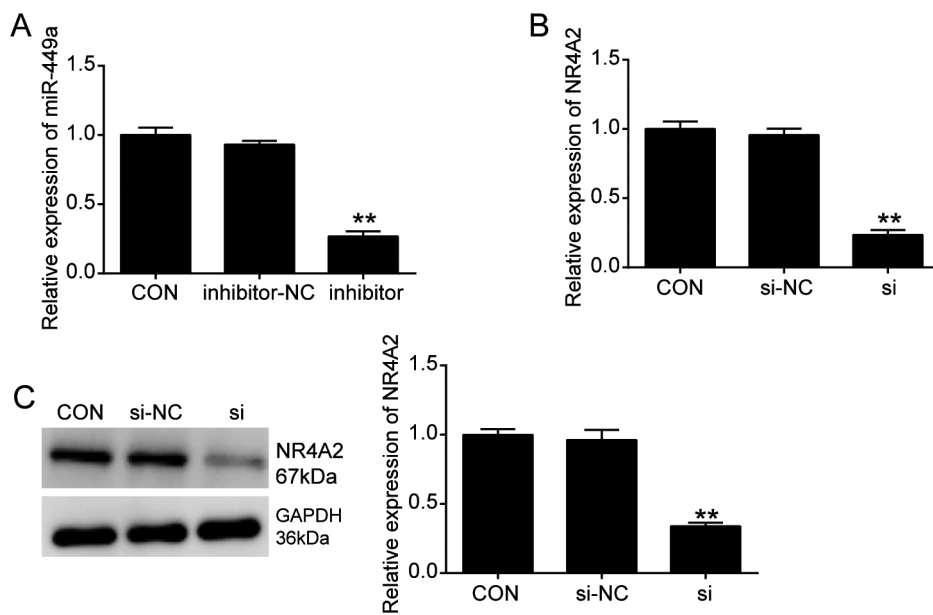

Table SI. mRNA expression levels in H9C2 cells treated with H/R injury.

| Gene name | Relative mRNA expression levels |             | P-value |
|-----------|---------------------------------|-------------|---------|
|           | Control                         | H/R         |         |
| THBS1     | 1.000±0.103                     | 0.847±0.126 | 0.1816  |
| SERPINE1  | 1.000±0.095                     | 1.052±0.075 | 0.4998  |
| SELE      | 1.000±0.125                     | 1.164±0.140 | 0.2056  |
| IL1RN     | 1.000±0.116                     | 0.628±0.120 | 0.0182  |
| CXCL8     | 1.000±0.098                     | 0.636±0.057 | 0.0095  |
| NAMPT     | 1.000±0.277                     | 1.086±0.383 | 0.7699  |
| IL6       | 1.000±0.101                     | 1.039±0.060 | 0.6056  |
| CCL2      | 1.000±0.134                     | 0.848±0.114 | 0.2096  |
| SOCS3     | 1.000±0.102                     | 0.736±0.114 | 0.0407  |
| CXCL2     | 1.000±0.088                     | 0.741±0.064 | 0.0175  |
| ATF3      | 1.000±0.097                     | 0.599±0.071 | 0.0058  |
| FOS       | 1.000±0.141                     | 0.907±0.115 | 0.4279  |
| FOSB      | 1.000±0.108                     | 0.797±0.043 | 0.0674  |
| NR4A2     | 1.000±0.053                     | 0.311±0.037 | 0.0001  |

P-value was analyzed by unpaired Student's t-test. H/R, hypoxia/reoxygenation.
